# Supplementary material for: Tumor stroma Siglec15 expression is a poor prognosis predictor in colon adenocarcinoma
Source: PubMed Central journal article supplement (PMC10583595; doi:10.7150/jca.87618), 2023-09-18
Supplement: jcav14p2998s1.pdf [file jcav14p2998s1.pdf]

## Supplementary Materials for

### **Tumor stroma Siglec15 expression is a poor prognosis predictor in colon adenocarcinoma**

#### **Authors:**

Weixiang Zhan<sup>1,2,3†</sup>, Fan Bai<sup>1,2,3†</sup>, Yue Cai<sup>1,2,3†</sup>, Jianwei Zhang<sup>1,2,3</sup>, Ge Qin<sup>1,2,3</sup>, Yuqian Xie<sup>1,2,3</sup>, and Yanhong Deng<sup>1,2,3\*</sup>

**† These authors have contributed equally to this work**

#### **\* Correspondence to:**

Yanhong Deng (Email: dengyanh@mail.sysu.edu.cn; Phone: +86(0)20-38254084)

#### **This PDF file includes:**

Figures S1 to S4  
Tables S1 to S2

Table S1. Basic characteristics of patients in colon adenocarcinoma

| Characteristic                | Patients   |
|-------------------------------|------------|
| <b>Age (Median 68)</b>        |            |
| Mean (Range)                  | 68 (24-90) |
| ≤68                           | 54 (52.9%) |
| > 68                          | 48 (47.1%) |
| <b>Gender</b>                 |            |
| Male                          | 58 (56.9%) |
| Female                        | 44 (43.1%) |
| <b>Tumor location</b>         |            |
| Right                         | 49 (48.0%) |
| Left                          | 53 (52.0%) |
| <b>Tumor growth pattern</b>   |            |
| Expansile                     | 33 (32.4%) |
| Intermediate                  | 24 (23.5%) |
| Infiltrative                  | 45 (44.1%) |
| <b>T classification (TNM)</b> |            |
| T1~2                          | 5 (4.9%)   |
| T3                            | 84 (82.4%) |
| T4                            | 13 (12.7%) |
| <b>N classification (TNM)</b> |            |
| N0                            | 63 (61.8%) |
| N+                            | 39 (38.2%) |
| <b>M classification (TNM)</b> |            |
| M0                            | 99 (97.1%) |
| M1                            | 3 (2.9%)   |
| <b>MMR status</b>             |            |
| MMR-proficient                | 92 (90.2%) |
| MMR-deficient                 | 10 (9.8%)  |
| <b>Siglec15 (SA)</b>          |            |
| Low                           | 45 (44.1%) |
| High                          | 57 (55.9%) |
| <b>Siglec15 (TA)</b>          |            |
| Low                           | 35 (34.3%) |
| High                          | 67 (65.7%) |
| <b>Siglec15 (whole)</b>       |            |
| Low                           | 42 (41.2%) |
| High                          | 60 (58.8%) |

Table S2. The association of Siglec15 expression with clinicopathological characteristics in MMR-p COAD

|                      | Patients | Siglec15(whole) |      |         | Siglec15(TA) |      |         | Siglec15(SA) |      |         |
|----------------------|----------|-----------------|------|---------|--------------|------|---------|--------------|------|---------|
|                      |          | Low             | High | p value | Low          | High | p value | Low          | High | p value |
| Age (median 68)      |          |                 |      | 0.6152  |              |      | 0.6488  |              |      | 0.0079  |
| ≤68                  | 43       | 18              | 25   |         | 13           | 30   |         | 25           | 18   |         |
| > 68                 | 49       | 18              | 31   |         | 17           | 32   |         | 15           | 34   |         |
| Gender               |          |                 |      | 0.106   |              |      | 0.8988  |              |      | 0.657   |
| Male                 | 53       | 17              | 36   |         | 17           | 36   |         | 22           | 31   |         |
| Female               | 39       | 19              | 20   |         | 13           | 26   |         | 18           | 21   |         |
| Tumor location       |          |                 |      | 0.9851  |              |      | 0.4657  |              |      | 0.4397  |
| Right                | 41       | 16              | 25   |         | 15           | 26   |         | 16           | 25   |         |
| Left                 | 51       | 20              | 31   |         | 15           | 36   |         | 24           | 27   |         |
| Tumor growth pattern |          |                 |      | 0.7193  |              |      | 0.914   |              |      | 0.4374  |
| Expansile            | 27       | 12              | 15   |         | 9            | 18   |         | 9            | 18   |         |
| Intermediate         | 24       | 8               | 16   |         | 7            | 17   |         | 11           | 13   |         |
| Infiltrative         | 41       | 16              | 25   |         | 14           | 27   |         | 20           | 21   |         |
| TNM stage            |          |                 |      | 0.2329  |              |      | 0.8347  |              |      | 0.4373  |
| Low                  | 58       | 20              | 38   |         | 20           | 38   |         | 27           | 31   |         |
| High                 | 34       | 16              | 18   |         | 10           | 24   |         | 13           | 21   |         |

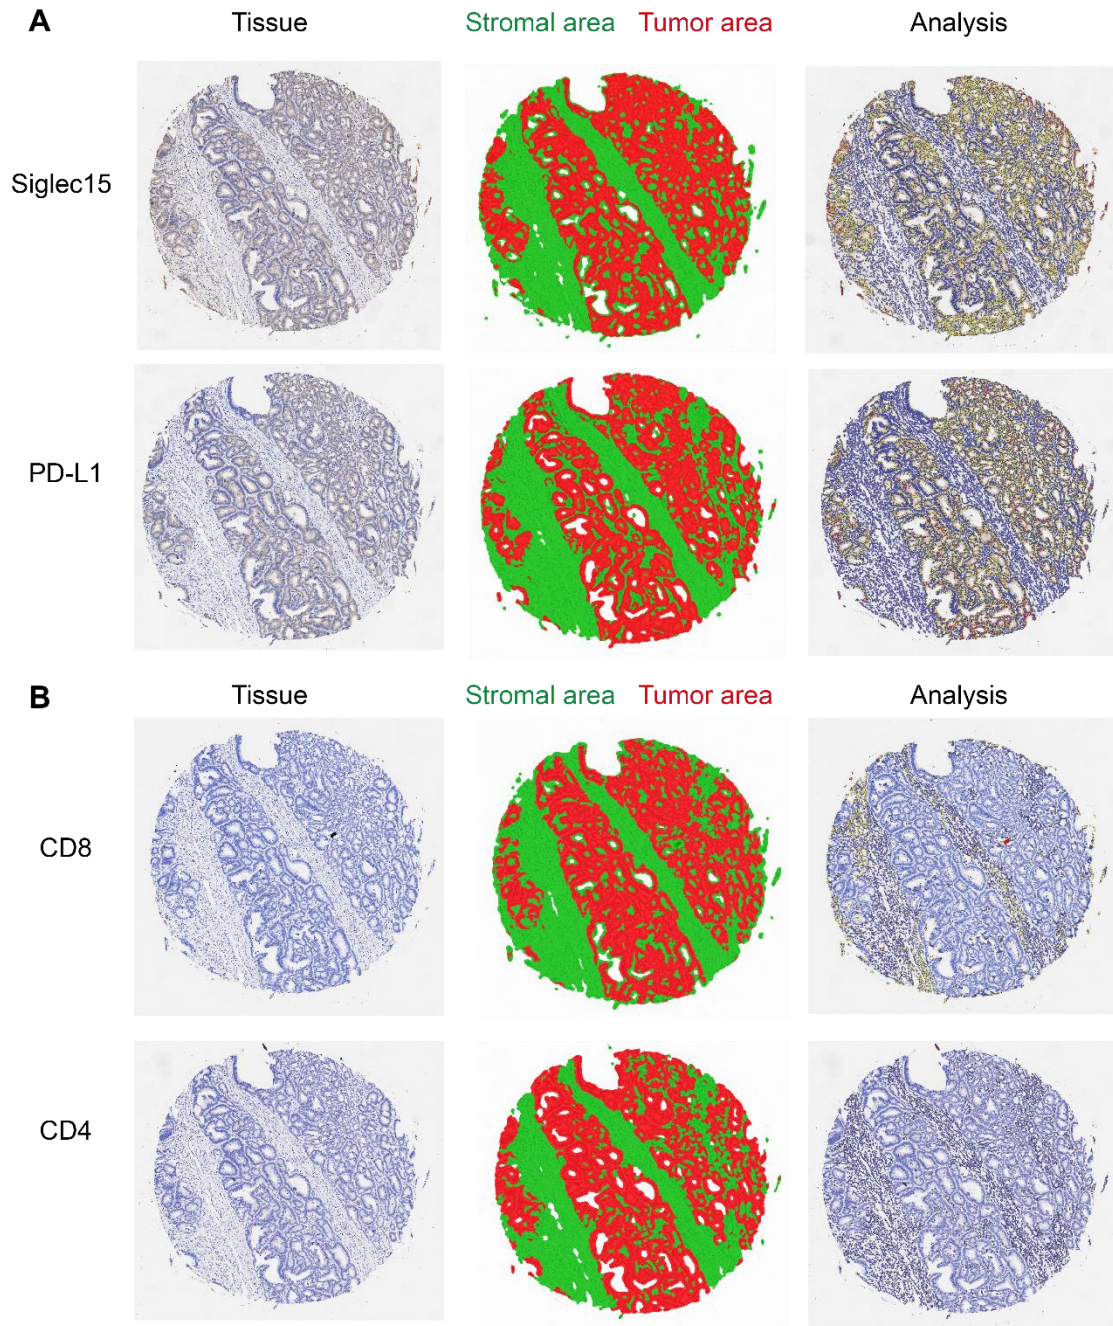

Figure S1 The classification of tissue into stromal area and tumor area. (A) Micrographs of Siglec15 and PD-L1 expression within tissue (left), and the classified stromal area and tumor area (middle), and the analysis of tumor or stromal area (right). (B) Micrographs of CD4 and CD8 expression within tissue(left), and the classified stromal area and tumor area (middle), and the analysis of stromal area(right).

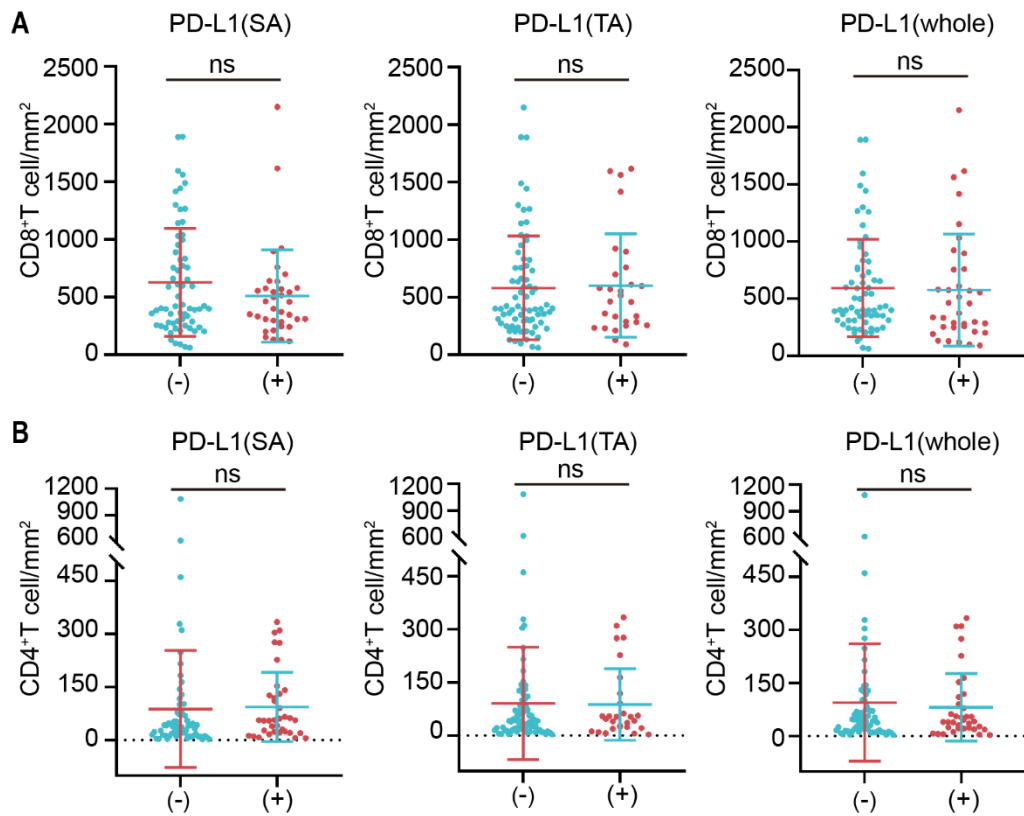

Figure S2 Relationship between PD-L1 expression and the infiltration of CD4<sup>+</sup>/CD8<sup>+</sup> TILs. (A and B) The correlation of PD-L1 expression and CD8<sup>+</sup> T cells (A) and CD4<sup>+</sup> T cells (B) in the COAD. Data are means  $\pm$  s.e.m. p values by student's *t*-test.

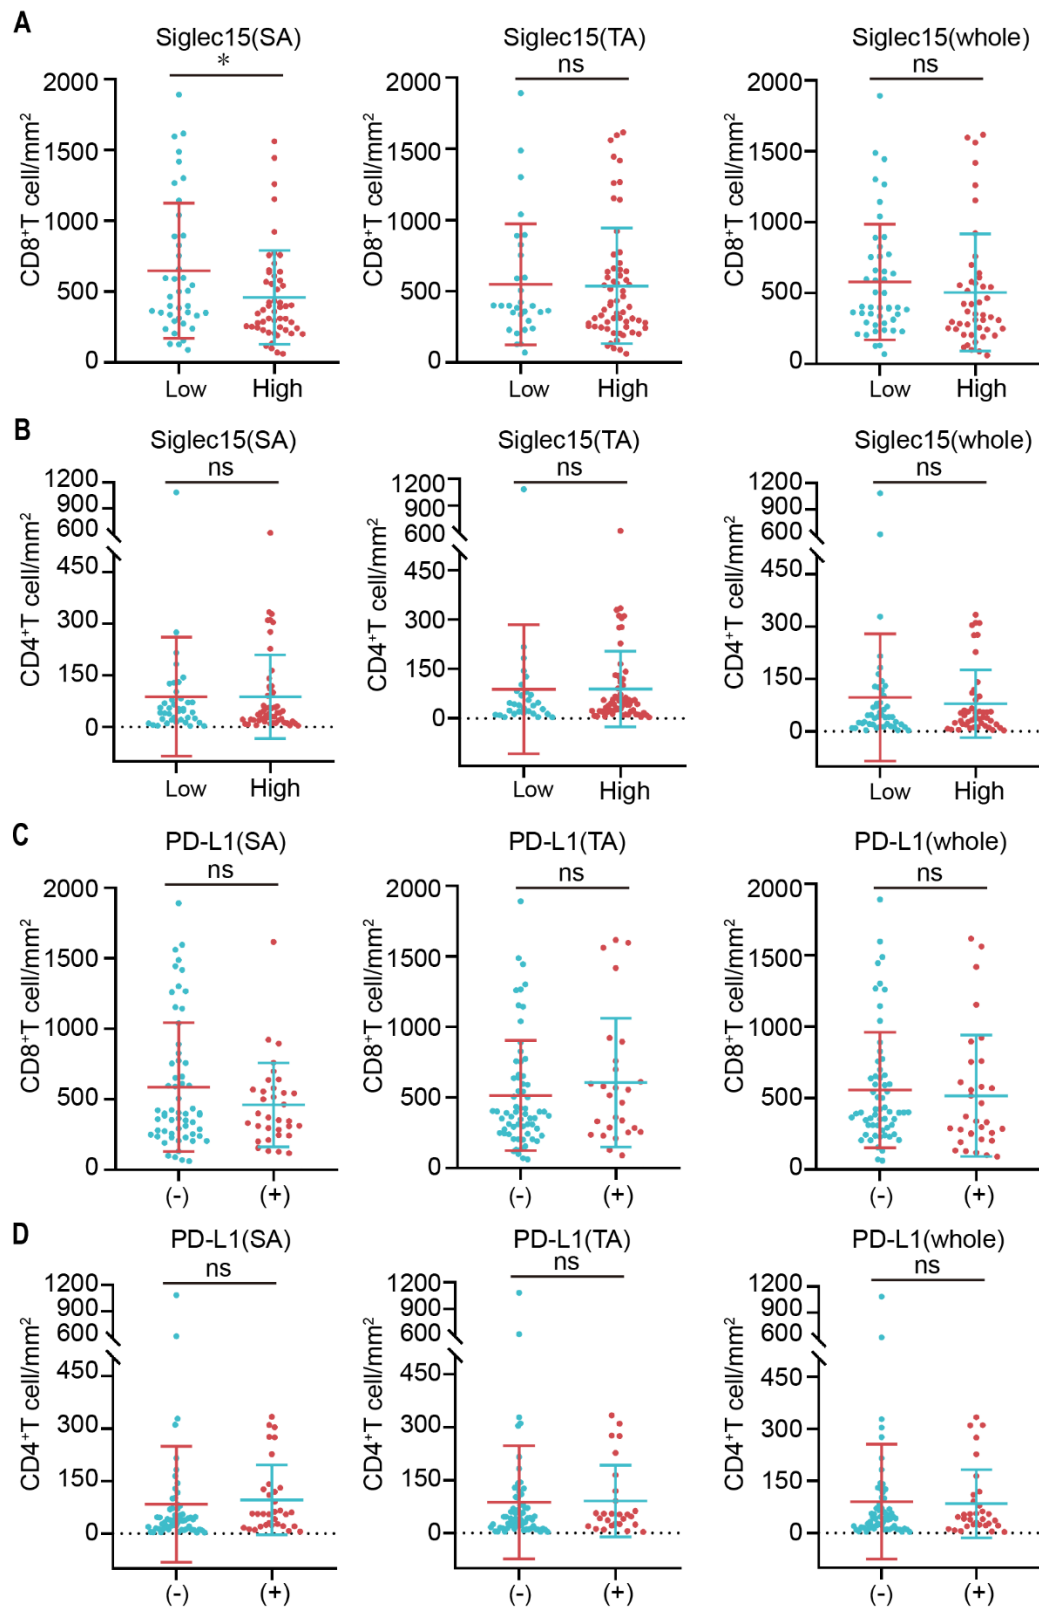

Figure S3 The correlation of Siglec15 and PD-L1 expression and CD8<sup>+</sup> T cells and CD4<sup>+</sup> T cells in the MMR-p COAD. (A and B) The correlation of Siglec15 expression and CD8<sup>+</sup> T cells (A) and CD4<sup>+</sup> T cells (B) in the MMR-p COAD. (C and D) The correlation of PD-L1 expression and CD8<sup>+</sup> T cells (C) and CD4<sup>+</sup> T cells (D) in the MMR-p COAD. Data are means  $\pm$  s.e.m. p values by student's *t*-test.

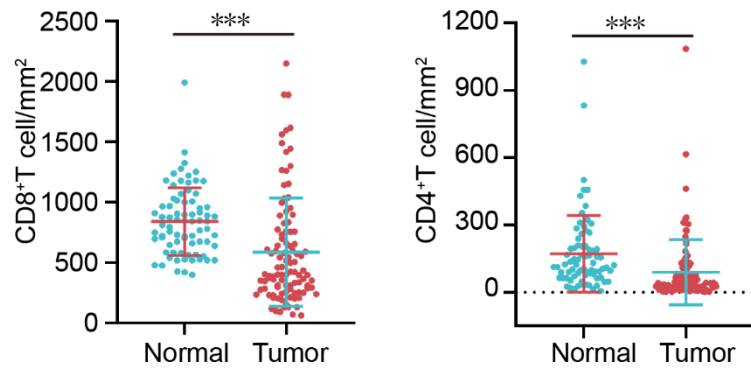

Figure S4 The comparison of CD8<sup>+</sup> T cells and CD4<sup>+</sup> T cells between COAD and adjacent normal tissues. Data are means  $\pm$  s.e.m. p values by student's *t*-test.
